# Supplementary material
Source: PubMed Central journal article supplement (PMC8974440)
Supplement: molcanres-19-1398-s001.pdf [file molcanres-19-1398-s001.pdf]

## Supplementary Information

### Mapping of m<sup>6</sup>A and Its Regulatory Targets in Prostate Cancer Reveals a METTL3-low Induction of Therapy Resistance

Kellie A. Cotter<sup>1</sup>, John Gallon<sup>2</sup>, Nadine Uebersax<sup>1</sup>, Philip Rubin<sup>1</sup>, Kate D. Meyer<sup>3,4</sup>, Salvatore Piscuoglio<sup>2,5,6</sup>, Samie R. Jaffrey<sup>7,\*</sup>, Mark A. Rubin<sup>1,8,9,\*</sup>

<sup>1</sup> Department for BioMedical Research, University of Bern, Bern, Switzerland

<sup>2</sup> Visceral surgery and Precision Medicine research laboratory, Department of Biomedicine, University of Basel, Basel, Switzerland

<sup>3</sup> Department of Biochemistry, Duke University School of Medicine, Durham, NC, USA

<sup>4</sup> Department of Neurobiology, Duke University School of Medicine, Durham, NC, USA

<sup>5</sup> Institute of Medical Genetics and Pathology, University Hospital Basel, Basel, Switzerland

<sup>6</sup> Clarunis, Department of Visceral Surgery, University Centre for Gastrointestinal and Liver Diseases, St. Clara Hospital and University Hospital Basel, Switzerland

<sup>7</sup> Department of Pharmacology, Weill Cornell Medicine, New York, NY, USA

<sup>8</sup> Inselspital, Bern, Switzerland

<sup>9</sup> Bern Center for Precision Medicine, Bern, Switzerland

\* Co-senior and corresponding authors:

[mark.rubin@dbmr.unibe.ch](mailto:mark.rubin@dbmr.unibe.ch)

[srj2003@med.cornell.edu](mailto:srj2003@med.cornell.edu)

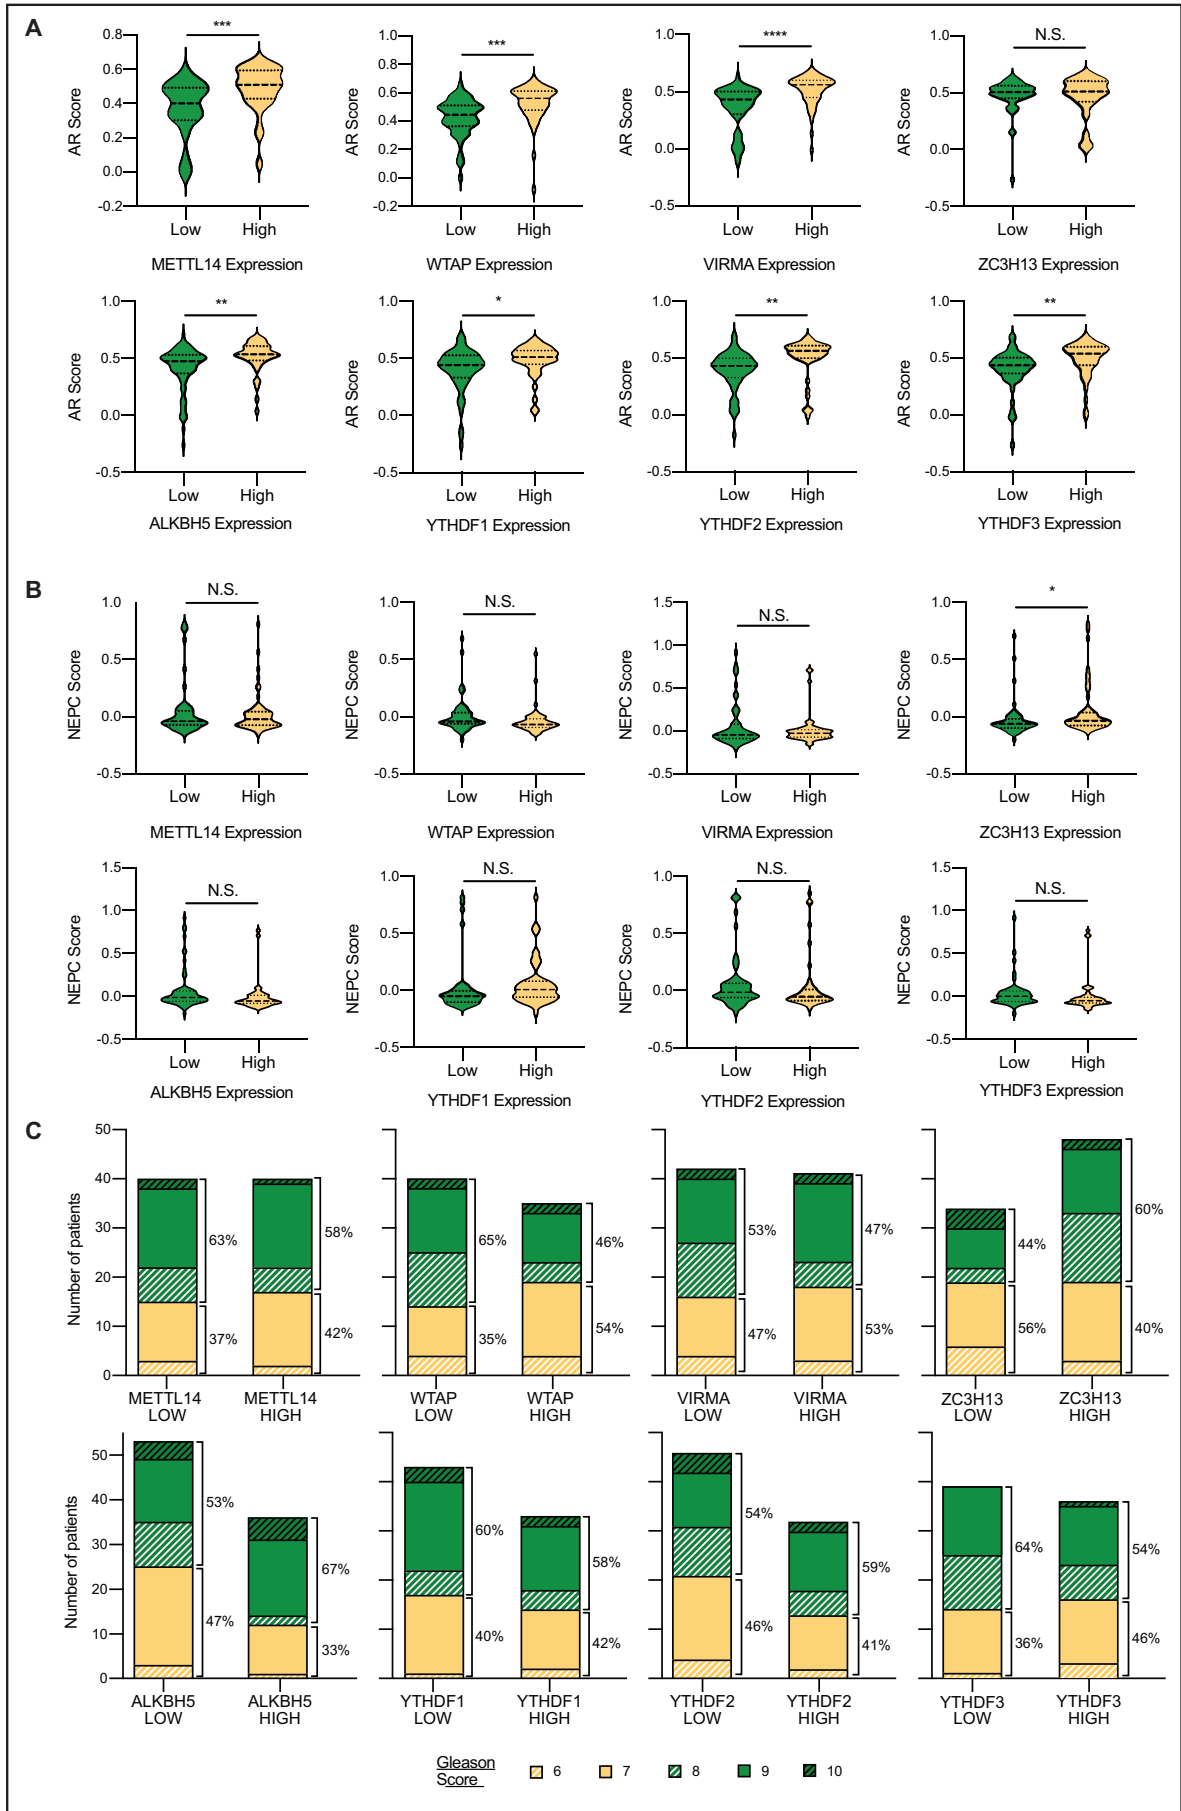

**Supplementary Figure 1. Association between m<sup>6</sup>A “writer”, “eraser”, and “reader” proteins and markers of advanced-stage disease. A)** Castration resistant prostate cancer samples<sup>31</sup> were grouped based on *METTL14*, *WTAP*, *VIRMA*, *ZC3H13*, *ALKBH5*, *YTHDF1*, *YTHDF2*, or *YTHDF3* expression: low, z-score > 1, n = 46, 50, 52, 48, 41, 42, 58, and 48 respectively; high, z-score < -1, n = 57, 50, 55, 52, 66, 53, 45, and 45 respectively. **A)** AR score in high vs. low samples. Median and quartiles are indicated with a dotted line, statistical significance is indicated as determined by t-test. **B)** NEPC score in high vs. low samples. Median and quartiles are indicated with a dotted line, statistical significance is indicated as determined by t-test. **C)** Gleason score in high vs. low samples. No statistically significant differences were detected by Fischer’s exact test between samples with Gleason 6-7 and Gleason 8+ scores.

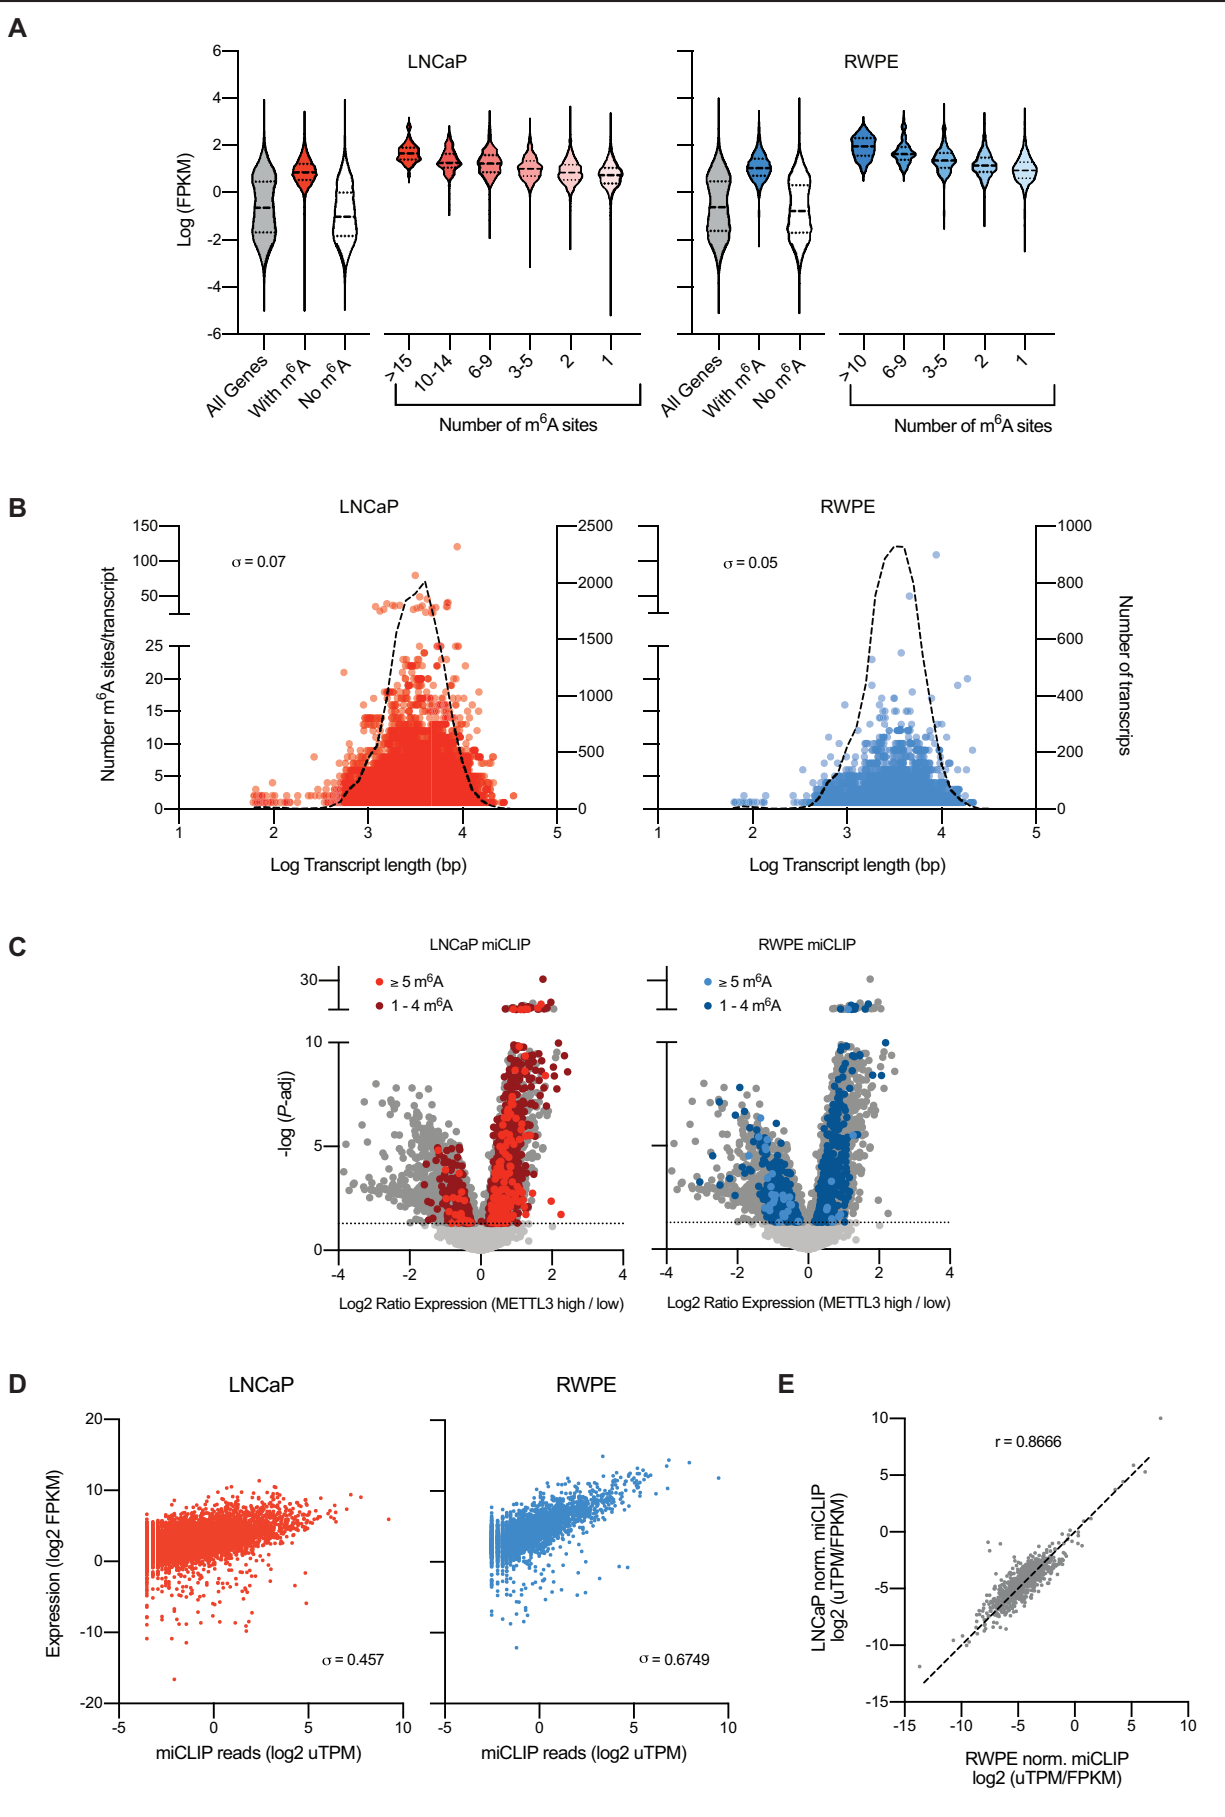

**Supplementary Figure 2. Relation of miCLIP results to transcript length and expression.**

**A)** Comparing the number of m<sup>6</sup>A sites per transcript to the transcript expression as determined by paired RNA-Seq. **B)** Comparing the number of m<sup>6</sup>A sites per transcript (circles, plotted on the left y-axis) to the transcript length shows no correlation (Spearman). The distribution is similar to the overall number of transcripts of a given length (dotted line, plotted on the right y-axis). **C)** Comparing the number of m<sup>6</sup>A sites per transcript (colored dots) to the changes in transcript expression detected between METTL3-high and -low patient samples (fold difference on x-axis and significance on y-axis), **D)** Normalizing m<sup>6</sup>A levels per transcript (unique tags per million, uTPM) by the transcript expression from RNA-seq (FPKM). **E)** Correlation between the normalized m<sup>6</sup>A levels per site (uTPM/FPKM) for the sites common to both LNCaP and RWPE cells lines (n = 889) (Pearson r = 0.937).

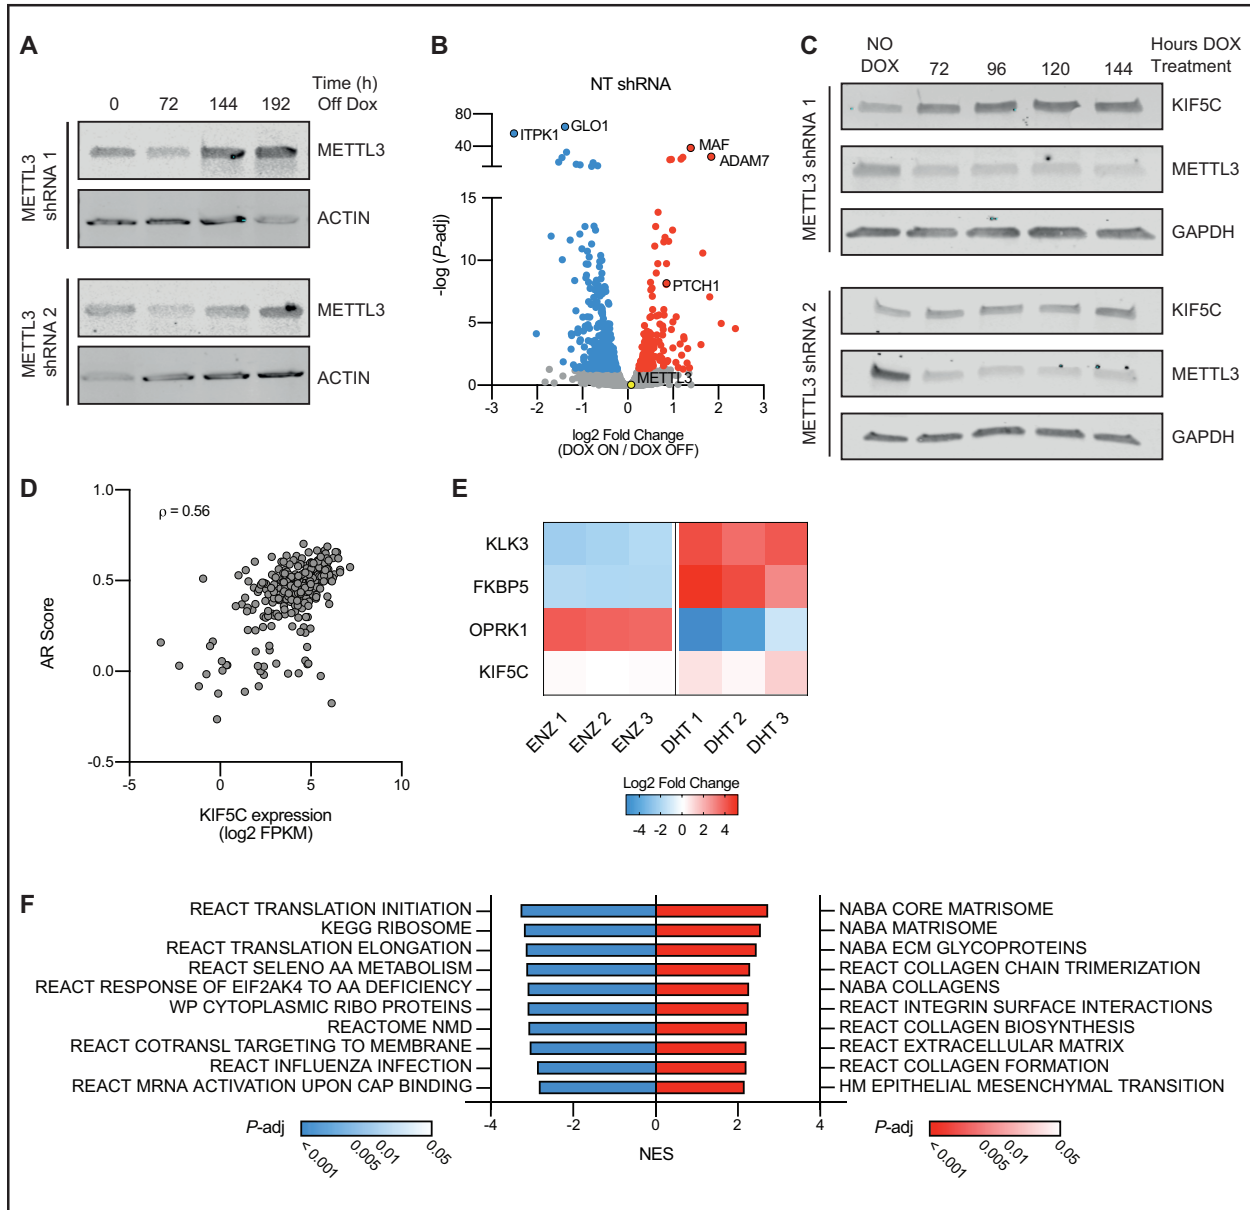

### Supplementary Figure 3. Reversible knockdown of *METTL3* in LNCaP cells upregulates

**KIF5C.** **A)** Doxycycline induction of *METTL3* shRNA is reversible. Cells were treated with

doxycycline for 96 hours, and then changed to media without doxycycline for the indicated

amount of time followed by Western blot analysis for *METTL3*. **B)** Significantly (adjusted *P*-value

< 0.05) differentially expressed genes with induction of the NT shRNA (*n* = 3). Common genes

also induced in the two *METTL3* shRNA lines are highlighted with a black border. **C)** Western

blot analysis of the upregulation of *KIF5C* with *METTL3* knockdown. Cells were treated with

doxycycline for the indicated amount of time. **D)** *KIF5C* expression is correlated with AR score in castration resistant prostate cancer samples<sup>31</sup> (n = 264) (Spearman's  $\rho = 0.56$ ). **E)** Fold change in expression of the *KIF5C* and the AR-regulated genes *KLK3*, *FKBP5* and *OPRK1* with DHT or ENZ treatment of LNCaP cells in published RNA-seq datasets (GSE110903, GSE147250, GSE135879, GSE130534, GSE115395). **F)** Gene set enrichment analysis of genes ranked by TE as determined by Riborex analysis of Ribo-seq data.

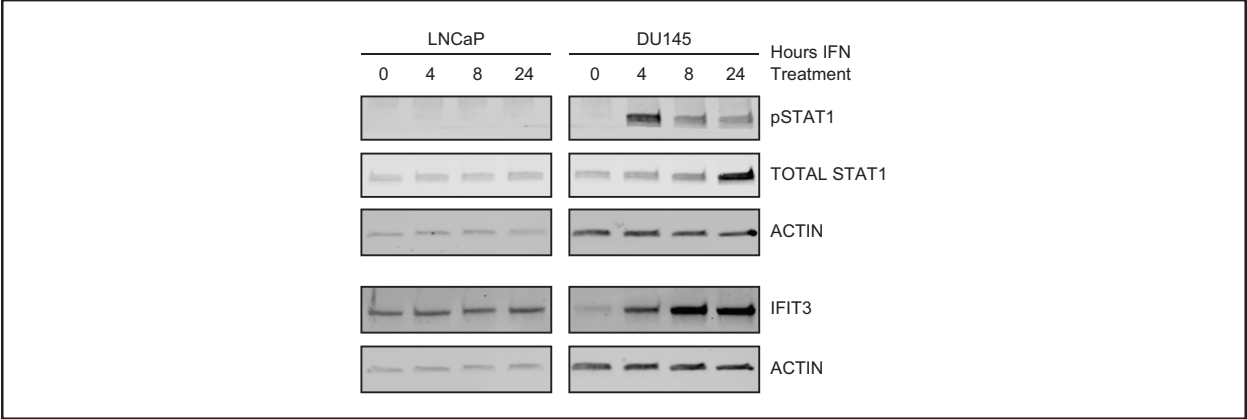

**Supplementary Figure 4. LNCaP cells do not respond to IFN.** Western blot analysis of IFN response as determined by the upregulation of STAT1 and IFIT3 in LNCaP and DU145 cells in response to IFN- $\alpha$  treatment.



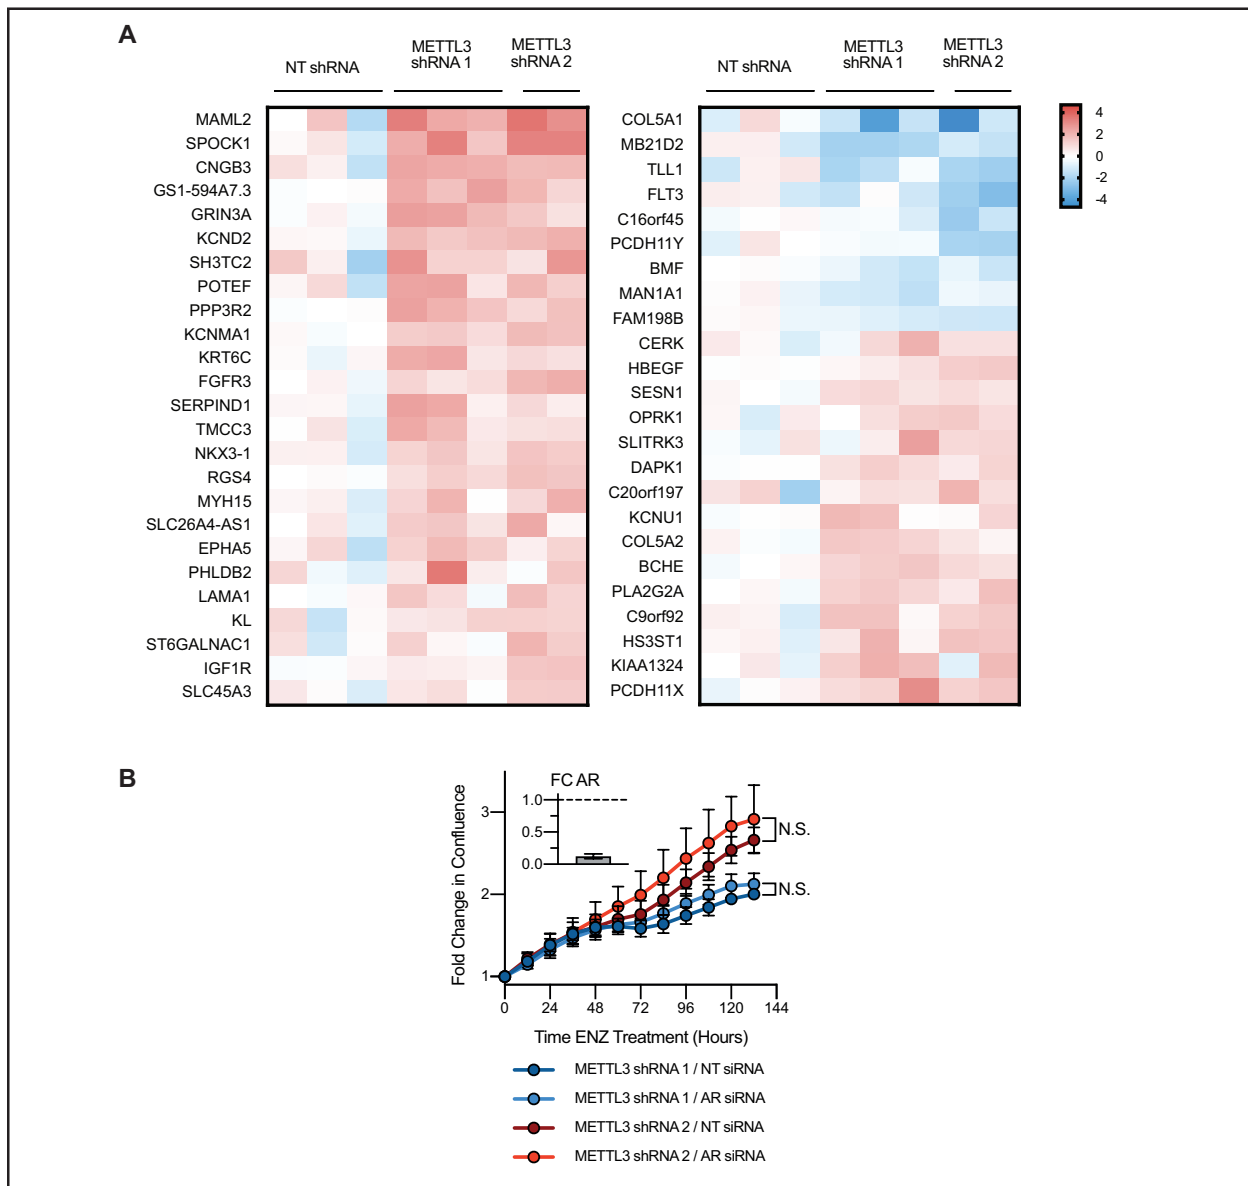

**Supplementary Figure 5. A subset of ENZ-regulated genes are differentially expressed with METTL3 knockdown and ENZ resistance is AR-independent. A)** Data is expressed as the fold-change over NT shRNA for all three lines with 24 hours of 10  $\mu$ M ENZ treatment. On the left and right are genes down-and up-regulated by ENZ respectively. **B)** Dual knockdown of *METTL3* and *AR* does not change the ability of the cells to proliferate in the presence of 10  $\mu$ M ENZ (n = 3, error bars = SEM). Plotted is the fold change in confluency compared to time zero.

Sufficient *AR* knockdown (88%) was confirmed in tandem by qPCR and is plotted in the top left as fold change over NT siRNA (n = 3).

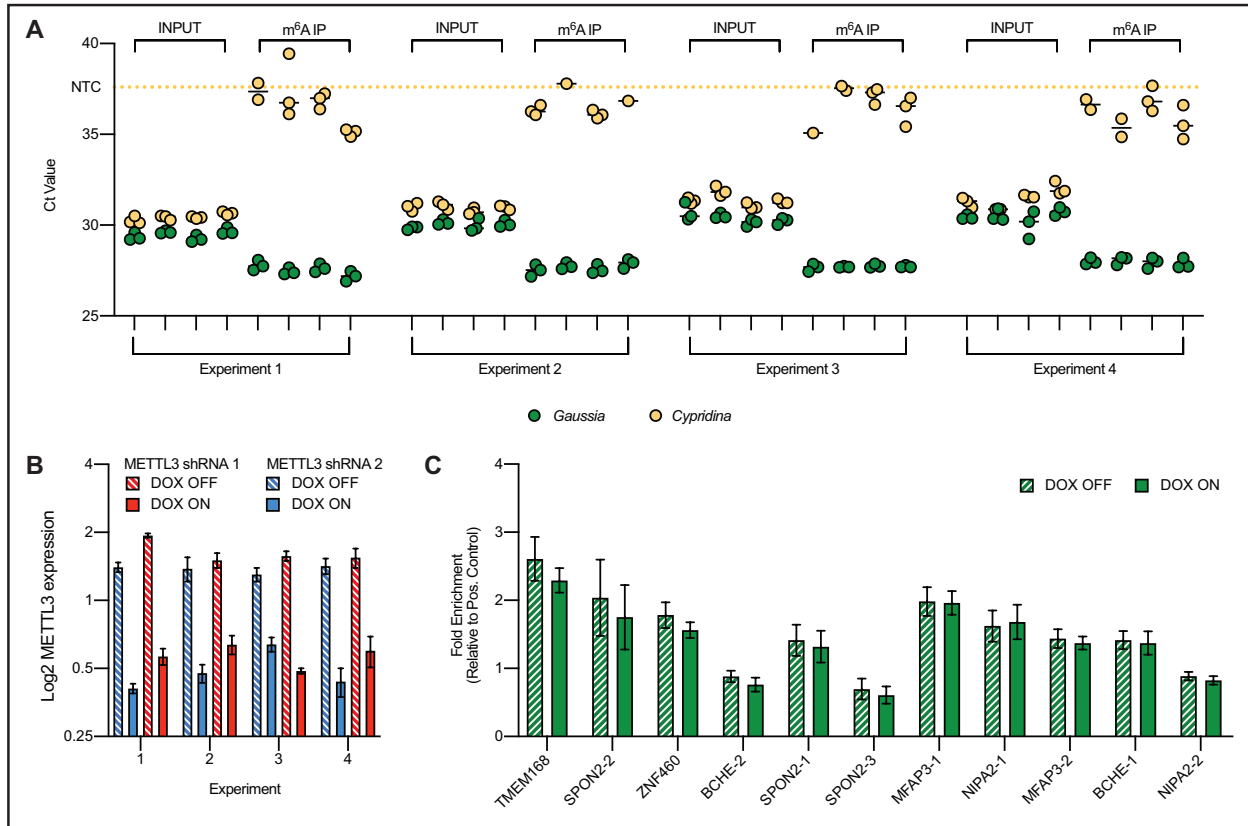

### Supplementary Figure 6. m<sup>6</sup>A-immunoprecipitation and qPCR of selected candidate

**genes. A)** Levels of spike-in control luciferase mRNAs in both input (5%) and IP pools for 4 independent experiments. The positive control *Gaussia* mRNA is synthesized to contain m<sup>6</sup>A while the negative control *Cypridina* mRNA contains no m<sup>6</sup>A. Plotted are the triplicate Ct values as determined by qPCR. In all experiments the levels *Cypridina* mRNA in the IP fractions are approximate to those seen in no template control reactions indicating no enrichment. **B)** Changes in the expression of *METTL3* in each experiment in response to doxycycline as measured by qPCR. Error bars indicate technical triplicates. **C)** Enrichment with m<sup>6</sup>A-IP over input for selected m<sup>6</sup>A sites on candidate genes normalized to the *Gaussia* luciferase positive control mRNA in response to *METTL3* knockdown (n = 8).

**Supplementary Table 1. Oligonucleotide Sequences**

|             |          |     |                                                                |
|-------------|----------|-----|----------------------------------------------------------------|
| qPCR        | GAPDH    | Fwd | GAC AGT CAG CCG CAT CTT CT                                     |
| qPCR        | GAPDH    | Rev | TTA AAA GCA GCC CTG GTG AC                                     |
| qPCR        | HMBS     | Fwd | AGC TTG CTC GCA TAC AGA CG                                     |
| qPCR        | HMBS     | Rev | AGC TCC TTG GTA AAC AGG CTT                                    |
| qPCR        | ACTB     | Fwd | TGA CGT GGA CAT CCG CAA AG                                     |
| qPCR        | ACTB     | Rev | CTG GAA GGT GGA CAG CGA GG                                     |
| qPCR        | METTL3   | Fwd | TTG TCT CCA ACC TTC CGT AGT                                    |
| qPCR        | METTL3   | Rev | CCA GAT CAG AGA GGT GTA G                                      |
| qPCR        | TMPRSS2  | Fwd | GTC CCC ACT GTC TAC GAG GT                                     |
| qPCR        | TMPRSS2  | Rev | CAG ACG ACG GGG TTG GAA G                                      |
| qPCR        | KLK3     | Fwd | TGG GGA CCA CCT GCT ACG CC                                     |
| qPCR        | KLK3     | Rev | TCG GTG ATC AGA ATG ACC CAC GAG                                |
| qPCR        | FKBP5    | Fwd | GCA ACA GTA GAA ATC CAC CTG                                    |
| qPCR        | FKBP5    | Rev | CTC CAG AGC TTT GTC AAT TCC                                    |
| qPCR        | NKX3.1   | Fwd | CCC ACA CTC AGG TGA TCG AG                                     |
| qPCR        | NKX3.1   | Rev | GAG CTG CTT TCG CTT AGT CTT                                    |
| qPCR        | AR       | Fwd | GTG TCA AAA GCG AAA TGG GC                                     |
| qPCR        | AR       | Rev | GCT TCA TCT CCA CAG ATC AGG                                    |
| qPCR        | NR5A2    | Fwd | CTT TGT CCC GTG TGT GGA GAT                                    |
| qPCR        | NR5A2    | Rev | GTC GGC CCT TAC AGC TTC TA                                     |
| M6A IP qPCR | SPON2_1  | Fwd | AAG AAG AGG CTG AGT GCG TC                                     |
| M6A IP qPCR | SPON2_1  | Rev | TTC AGT GCA GAG ATG GTC GG                                     |
| M6A IP qPCR | SPON2_2  | Fwd | CAA GAG CAG GAC TCG CTA CG                                     |
| M6A IP qPCR | SPON2_2  | Rev | AGA CGC AGT TAT CAG GGA CG                                     |
| M6A IP qPCR | SPON2_4  | Fwd | CTC CCA CGT GGT TGC AGA TA                                     |
| M6A IP qPCR | SPON2_4  | Rev | TCC GAA ACC GCC CCA TTT AT                                     |
| M6A IP qPCR | MFAP3_1  | Fwd | CAG AGT CTC AAG GCA GCA GTC                                    |
| M6A IP qPCR | MFAP3_1  | Rev | GCT GAC AGT TTT CAT ATG CCC C                                  |
| M6A IP qPCR | MFAP3_2  | Fwd | AGC CCC AGA TAA ACA TGA TGG G                                  |
| M6A IP qPCR | MFAP3_2  | Rev | ACC AGA AGA GAA ACC ATG GGA C                                  |
| M6A IP qPCR | ZNF460   | Fwd | CAT CTC TGT GGG AAA ACC TGT                                    |
| M6A IP qPCR | ZNF460   | Rev | CCA CTG GGT CTC TTT CAT GGG                                    |
| M6A IP qPCR | TMEM168  | Fwd | AGT GCA AGG AGC AGA GTT GA                                     |
| M6A IP qPCR | TMEM168  | Rev | TGC GTC CCT TTT CAG TCC AG                                     |
| M6A IP qPCR | BCHE_1   | Fwd | TCC AGG AGT GAG TGA GTT TGG                                    |
| M6A IP qPCR | BCHE_1   | Rev | AGG CCT CAC GGT AGT TTT CAG                                    |
| M6A IP qPCR | BCHE_2   | Fwd | GGA AAG CAG GAT TCC ATC GC                                     |
| M6A IP qPCR | BCHE_2   | Rev | ACC CAC ACA ACT TTC TTT CTT GC                                 |
| M6A IP qPCR | NIPA_1   | Fwd | GGA GTG GCA AGA TAT GCC TGT                                    |
| M6A IP qPCR | NIPA_1   | Rev | TGC CAT TCA TTG CTT TCT CGT                                    |
| M6A IP qPCR | NIPA_2   | Fwd | AGG AGT GGC AAG ATA TGC CT                                     |
| M6A IP qPCR | NIPA_2   | Rev | GGC ATG CAA CAA GAA TAT CCC C                                  |
| shRNA       | METTL3 1 | Fwd | CCGGGCAAGTATGTTCACTATGAAACTCGAGTTTCATAG<br>TGAACATACTTGCTTTTTG |
| shRNA       | METTL3 1 | Rev | AATTCAAAAAGCAAGTATGTTCACTATGAAACTCGAGTTT<br>CATAGTGAACATACTTGC |

|       |          |     |                                                            |
|-------|----------|-----|------------------------------------------------------------|
| shRNA | METTL3 2 | Fwd | CCGGGCTGCACTTCAGACGAATTATCTCGAGATAATTCTCTGAAGTGCAGCTTTTTG  |
| shRNA | METTL3 2 | Rev | AATTCAAAAAGCTGCACTTCAGACGAATTATCTCGAGATAATTCGTCTGAAGTGCAGC |
| shRNA | GFP      | Fwd | CCGGTACAACAGCCACAACGTCTATCTCGAGATAGACGTGTGGCTGTTGTATTTTTG  |
| shRNA | GFP      | Rev | AATTCAAAAATACAACAGCCACAACGTCTATCTCGAGATAGACGTTGTGGCTGTTGTA |
